# Supplementary material for: Inkjet-printed paper-based SERS dipsticks and swabs for trace chemical detection
Source: Royal Society of Chemistry journal article supplement (doi:10.1039/c2an36116g), 2012-09-13
Supplement: c2an36116g.pdf [file c2an36116g.pdf]

Electronic supplementary information

## Inkjet-Printed Paper-Based SERS Dipsticks and Swabs for Trace Chemical Detection

*Wei W. Yu and Ian M. White<sup>a</sup>*

Fischell Department of Bioengineering, University of Maryland, College Park, MD 20742, USA.

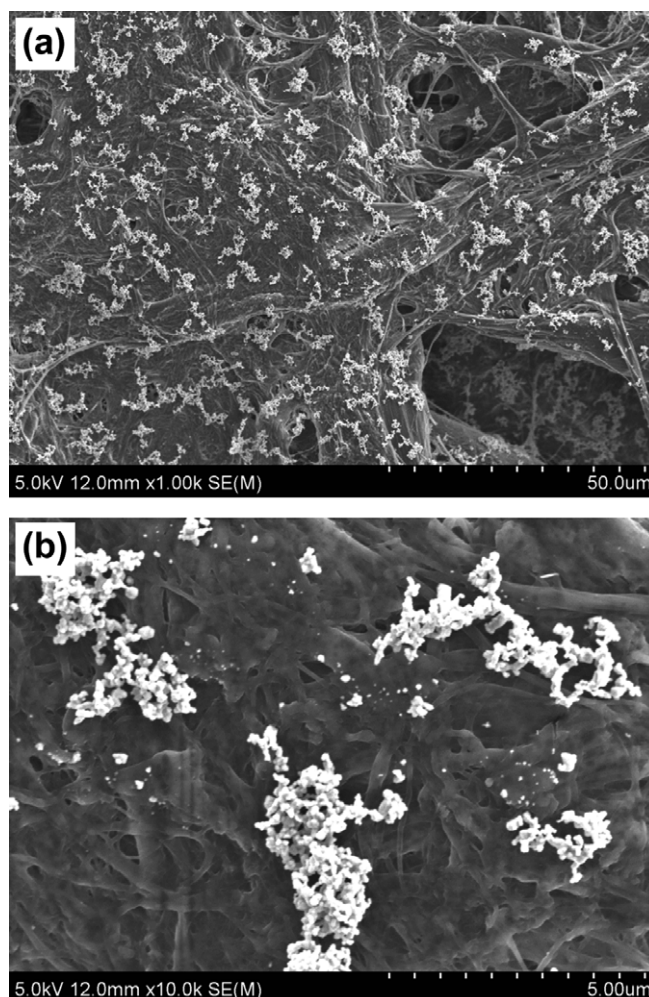

Figure S-1. (a) SEM image showing the distribution of clusters of silver nanoparticles on the cellulose matrix. (b) Higher resolution SEM image showing the aggregation of nanoparticles within a cluster

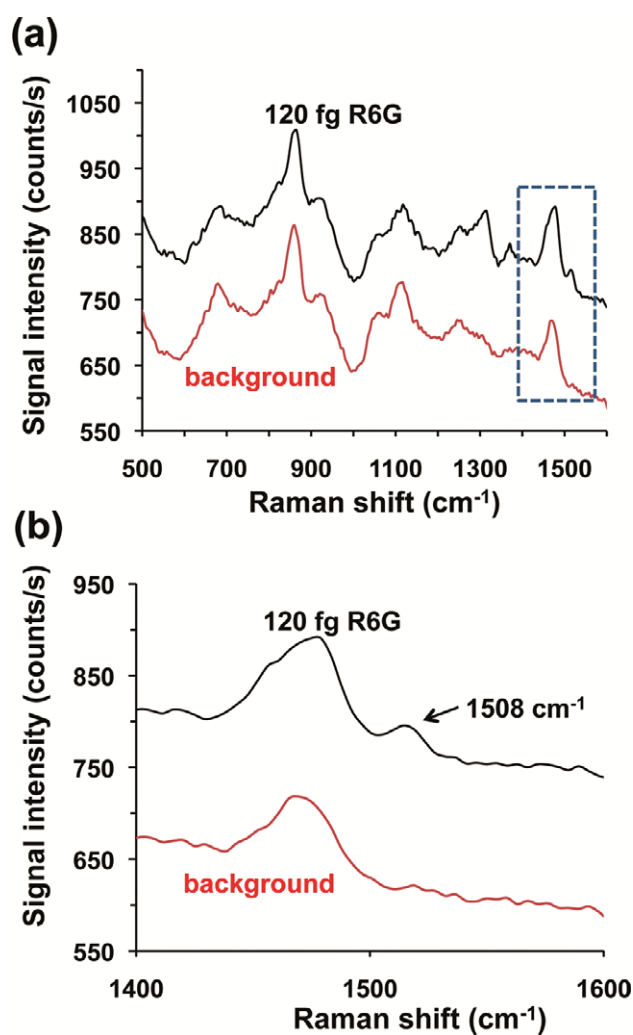

Figure S-2. (a) Comparison of the SERS signal from 120 femtograms of R6G with the background signal of the paper SERS substrate. (b) Magnified view of selected portion of the SERS spectra showing the 1508 cm<sup>-1</sup> peak. Note: The background spectrum has been shifted for clarity.
